# Supplementary material for: Developing an automated risk management tool to minimize bird and bat mortality at wind facilities
Source: Springer Nature journal article supplement (doi:10.1007/s13280-015-0707-z), 2015-10-27
Supplement: MOESM1 [file 15654396]

***AMBIO***

**Electronic Supplementary Material**

*This supplementary Material has not been peer reviewed.*

**Title: Developing an automated risk management tool to minimize bird and bat mortality at wind facilities**

Authors: Julia Robinson Willmott, Greg M. Forcey, Lauren A. Hooton

SUPPLEMENTARY MATERIAL

Table S1 Bat species of Delaware and North American bat species known to be active offshore in the U.S. Atlantic Region (Pelletier et al. 2013; Peterson et al. 2014).

| Common Name             | Scientific Name                  | Known Location |                               |
|-------------------------|----------------------------------|----------------|-------------------------------|
|                         |                                  | Delaware       | Offshore U.S. Atlantic Region |
| Eastern red bat         | <i>Lasiurus borealis</i>         | X              | X                             |
| Hoary bat               | <i>Lasiurus cinereus</i>         | X              | X                             |
| Silver-haired bat       | <i>Lasionycteris noctivagans</i> | X              | X                             |
| Big brown bat           | <i>Eptesicus fuscus</i>          | X              | X                             |
| Tri-colored bat         | <i>Perimyotis subflavus</i>      | X              | X                             |
| Little brown bat        | <i>Myotis lucifugus</i>          | X              |                               |
| Northern long-eared bat | <i>Myotis septentrionalis</i>    | X              |                               |
| Evening bat             | <i>Nycticeius humeralis</i>      | X              |                               |
| Seminole bat            | <i>Lasiurus seminolus</i>        |                | X                             |

Table S2 Complete data on bat passes recorded over 4 days by the thermographic video cameras during the ATOM test deployment at UD-Lewes (July–August 2011)

| Date<br>(YYYY-MM-DD) | Start Time   | Flight Altitude (m) | Mean Bearing (degrees and compass) | Velocity (m s <sup>-1</sup> ) |
|----------------------|--------------|---------------------|------------------------------------|-------------------------------|
| 2011-08-13           | 20:59:28.066 | Data Not Available  | 52.79 ENE                          | Data Not Available            |
| 2011-08-13           | 21:01:04.561 | 41.9                | 12.02 NNE                          | 6.4                           |
| 2011-08-13           | 21:11:51.759 | 54.4                | 18.26 NNE                          | 8.1                           |
| 2011-08-13           | 21:56:31.198 | Data Not Available  | 79.17 ENE                          | Data Not Available            |
| 2011-08-13           | 22:14:19.231 | Data Not Available  | 40.48 NNE                          | Data Not Available            |
| 2011-08-13           | 23:04:53.330 | 18                  | 40.78 NNE                          | 3.3                           |
| 2011-08-13           | 23:57:31.330 | 44                  | 19.95 NNE                          | 6.8                           |
| 2011-08-14           | 01:53:39.792 | Data Not Available  | 37.19 NNE                          | Data Not Available            |
| 2011-08-14           | 01:53:41.231 | Data Not Available  | 9.41 NNE                           | Data Not Available            |
| 2011-08-14           | 01:53:51.429 | 44.2                | 1.74 NNE                           | 7.0                           |
| 2011-08-14           | 20:56:51.429 | 43.4                | 6.73 NNE                           | 5.4                           |
| 2011-08-15           | 01:20:09.330 | 73.3                | 5.36 NNE                           | 7.7                           |
| 2011-08-15           | 02:09:30.561 | Data Not Available  | 6.32 NNE                           | Data Not Available            |
| 2011-08-15           | 02:31:32.363 | Data Not Available  | 40.32 NNE                          | Data Not Available            |
| 2011-08-15           | 02:59:31.759 | Data Not Available  | 40.32 NNE                          | Data Not Available            |
